# Supplementary material for: ScATG8 Gene Cloned from Desert Moss Syntrichia caninervis Exhibits Multiple Stress Tolerance
Source: Plants (Basel). 2023 Dec 23;13(1):59. doi: 10.3390/plants13010059 (PMC10780840; doi:10.3390/plants13010059)
Supplement: Supplementary file 1 [file plants-13-00059-s001.zip › Supplemental Tables.xlsx]

## Sheet: Tabel S1
Table S1:List of the primers used in this study
Gene name	Forward primer sequences	Reverse primer sequences	Usage
ScATG8	ATGGCGAAGAGTTCGTTCAAGCAG	CTAACAGGTGATGACGTCGTC	Gene cloning
ScActin	TCGTGTTGTCTGGAGGATCG	TACTCGCTCTTCGCAATCCA	qRT-PCR
ScTubulin2	CGGTCATTACACCGTGGGAA	CCTCTCCAGCAACAGCGAA	qRT-PCR
CFP-ScATG8	CATGGTCCTGCTGGAGTTCGTG	CTAACAGGTGATGACGTCGTC	PCR
ScATG8	GAGTTCGTTCAAGCAGGAG	TCACGAAGATGAAGATGGC	qRT-PCR
CFP-ScATG8	CATGGTCCTGCTGGAGTTCGTG	TCACGAAGATGAAGATGGC	Transgene validation

## Sheet: Table S2 
Table S2: The partial sequence of ScATG8 gene
ScATG8 insert sequence in pFGC5941	insert sequence
sense	CCATGGCCGTGACAAGTACCCCGACAGAATTCCCGTGATTGTGGAGAAGGCGGAGAAGAGCGATATTCCCGATATTGACAAGAAGAAGTATCTTGTGCCGGCTGACTTGACGGTTGGACAGTTTGTGTACGTCATAAGGAAGCGCATCAAGTTGAGCGCGGAGAAGGCCATCTTCATCTTCGTGAAGAACGTGCTGCCCCCAACAGCGATTTAAAT
antisense	TTAATTAACCGTGACAAGTACCCCGACAGAATTCCCGTGATTGTGGAGAAGGCGGAGAAGAGCGATATTCCCGATATTGACAAGAAGAAGTATCTTGTGCCGGCTGACTTGACGGTTGGACAGTTTGTGTACGTCATAAGGAAGCGCATCAAGTTGAGCGCGGAGAAGGCCATCTTCATCTTCGTGAAGAACGTGCTGCCCCCAACAGCGGGATCC

## Sheet: Table S3
Table S3: gene ID and protein sequence of ATG8
Species name	Gene ID	Abbreviation of Species name	Protein sequence	Source
S.cerevisiae	852200	Sce	MKSTFKSEYPFEKRKAESERIADRFKNRIPVICEKAEKSDIPEIDKRKYLVPADLTVGQFVYVIRKRIMLPPEKAIFIFVNDTLPPTAALMSAIYQEHKDKDGFLYVTYSGENTFGR	http://www.ncbi.nlm.nih.gov/
Chlamydomonas reinhardtii	Cre16.g689650	Cr	MVGSRPPTFKQEHSLDKRKAEAARIKEKYPDRIPVIVEKAERSDIPDIDKKKYLVPSDLTVGQFVYVIRKRIKLSPEKAIFIFVKNVLPPTAALMSSIYEDHKDEDGFLYITYSGENTFGAGEQLQLPVEELAL	http://www.chlamy.org/chlamydb.html
Anthoceros punctatus	utg000152l	Ap	MAKSSFKQEHPLEKRQAEAARIRDKYPDRIPVIVEKADKSDIPDIDKKKYLVPADLTVGQFVYVIRKRIKLSSEKAIFIFVKNVLPPTAAMMSSIYDEHKDEDGFLYFTYSGENTFGGLQLRQ	https://www.hornworts.uzh.ch/en/download.html
Marchantia paleacea	MUAA02000010.1	Mp	MGESEFQFKQTNNLESRQAESARILEKYPDRVPVIVKRADKSSIPDIDKKKFLVPVDLAVGQFVFVIRKRMKLTPEKAIFVFVKDVLPPTSAMMAQIYDEYKDQDGFLYMTYSGENTFGFLQEDVVVG	http://www.ncbi.nlm.nih.gov/
Physcomitrium patens	Pp3c1_32170	Pp	MAKNSFKQEHPMEKRQAEAARIRDKYPDRIPVIVEKAEKSDISDIDKKKYLVPADLTVGQFVYVIRKRIKLSSEKAIFIFVKNVLPPTAAMMSSIYDEHKDEDGFLYFTYSGENTFGDVINCQKY	http://www.ncbi.nlm.nih.gov/
Syntrichia caninervis	Sc_g16000	Sc	MAKSSFKQEHPMEKRQAEAARIRDKYPDRIPVIVEKAEKSDIPDIDKKKYLVPADLTVGQFVYVIRKRIKLSAEKAIFIFVKNVLPPTAAMMSSIYDEHKDEDGFLYFTYSGENTFGDDVITC	http://www.ncbi.nlm.nih.gov/
Bryum argenteum	BA06G06240.1	Ba	MAKSSFKQEHPLEKRQAEAARIRDKYPDRIPVIVEKAEKSDIPDIDKKKYLVPADLTVGQFVYVIRKRIKLSSEKAIFIFVKNVLPPTAAMMSSIYDEHKDEDGFLYFTYSGENTFGDVITC	http://www.ncbi.nlm.nih.gov/
Selaginella moellendorffii	112347846	Sm	MGFKDEHSFDSRLAESSKIRQKYADRIPVIVEKAPRSNLPAMDKPKYLVPADLTVGQLVYIINRRLSLSPGQALFIFVGKVLPQTGAMMMSIYNDYKDKDGFLYVTYSGEEVFGGETI	http://www.ncbi.nlm.nih.gov/
Arabidopsis thaliana	At1G62040	At	MANSSFKLEHPLERRQIESSRIREKYPDRIPVIVERAERSDVPNIDKKKYLVPADLTVGQFVYVVRKRIKLSAEKAIFVFVKNTLPPTAAMMSAIYDENKDEDGFLYMTYSGENTFGLV	TAIR - Home Page (arabidopsis.org)
Zea mays	GRMZM2G419694	Zm	MAKTSSFKLEHPLEKRQSEANRIREKYPDRIPVIVEKAERSDIPDIDKKKYLVPADLTVGQFVYVVRKRIKLSAEKAIFIFVKNTLPPTAALMSSIYEENKDEDGFLYMTYSGENTFGLL	http://www.ncbi.nlm.nih.gov/
Triticum aestivum	KF294810	Ta	MAKSSFKLEHPLERRQAEANRIREKYSDRIPVIVEKAGKSDIPDIDKKKYLVPADLTVGQFVYVVRKRIKLSAEKAIFIFVKNTLPPTAALMSAIYEENKDEDGFLYMTYSGENTFGLL	http://www.ncbi.nlm.nih.gov/
Oryza sativa,	Os04g0624000	Os	MAKSSFKLDHTLERRQAEANRIREKYSDRIPVIVEKAERSDIPDIDKKKYLVPADLTVGQFVYVVRKRIKLSPEKAIFIFVKNTLPPTAALMSAIYEENKDEDGFLYMTYSGENTFGLL	http://www.ncbi.nlm.nih.gov/
Nicotiana tabacum	AIS71902.1	Nt	MAKSSFKLEHPLERRQAEAARIREKYPDRIPVIVEKAERSDIPDIDKKKYLVPADLTVGQFVYVVRKRIKLSAEKAIFIFVKNILPPTAAMMSAIYEEHKDEDGFLYMTYSGENTFGSF	http://www.ncbi.nlm.nih.gov/
